# Supplementary material for: Imidazolium Salt for Enhanced Interfacial Shear Strength in Polyphenylene Sulfide/Ex-PAN Carbon Fiber Composites
Source: MDPI journal article supplement (doi:10.3390/polym14173692), 2022-09-05
Supplement: s1 [file s1]

## Supplementary Materials

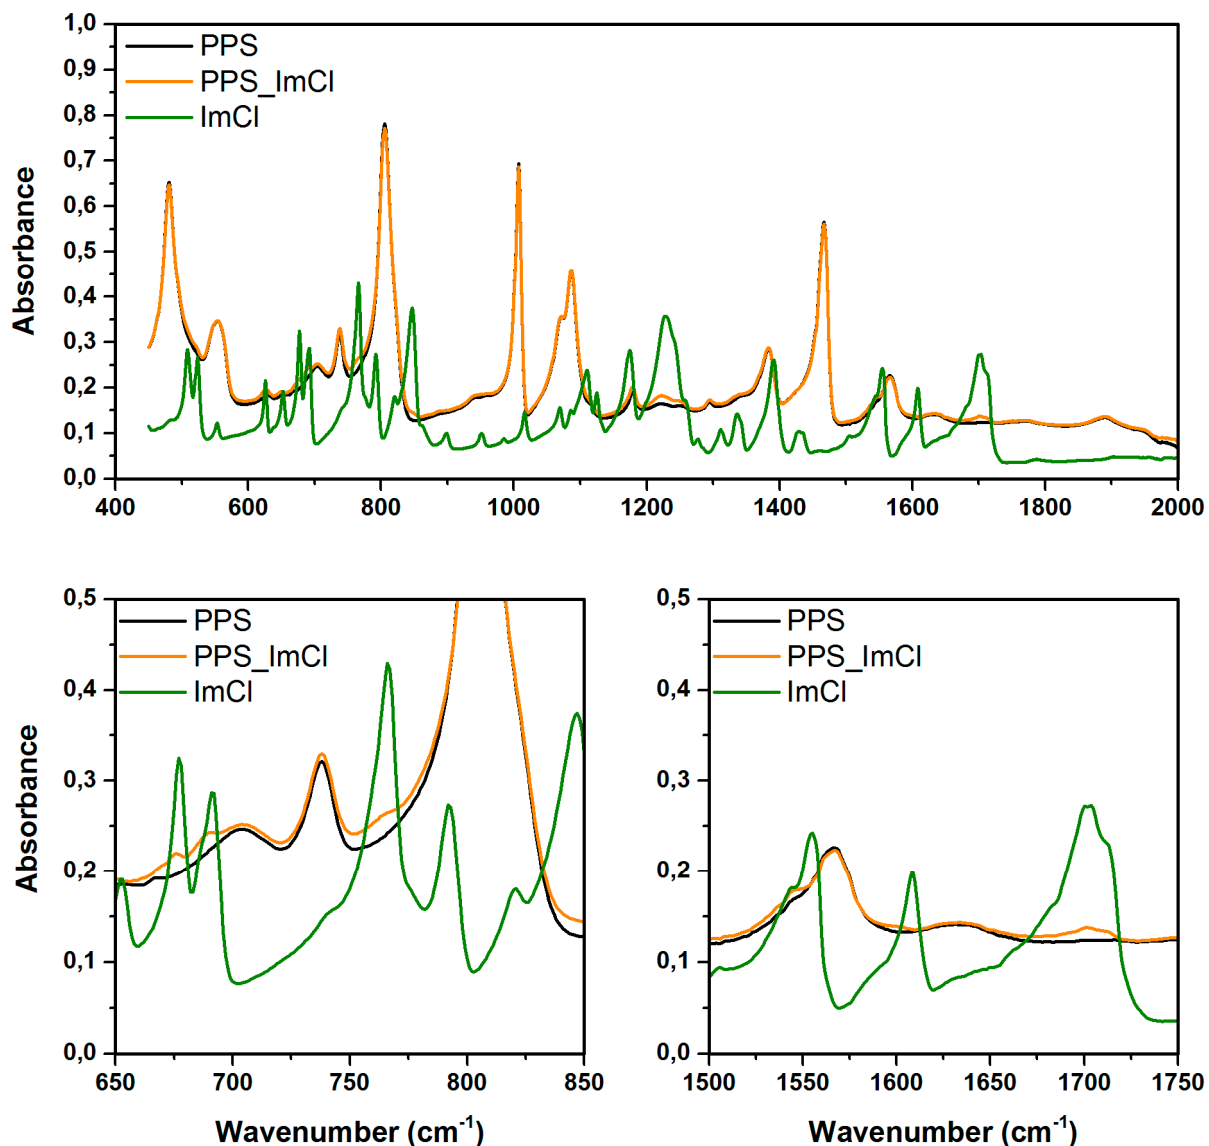

Figure S1. FTIR spectra of neat PPS ,PPS\_ImCl at 300°C and ImCl at room temperature .

Table S1. Main infrared band assignments for PPS.

| Peak position $\text{cm}^{-1}$<br>( $T_{\text{amb}}$ ) [27] | Peak observed $\text{cm}^{-1}$<br>Present work (300 °C) | Band assignment [27]      |
|-------------------------------------------------------------|---------------------------------------------------------|---------------------------|
| 1574                                                        | 1568                                                    | Sym. Ring stretching      |
| 1472                                                        | 1467                                                    | Ring stretching           |
| 1389                                                        | 1384                                                    | Ring stretching           |
| 1093                                                        | 1086                                                    | Anti. Ring-S stretching   |
| 1074                                                        | 1071                                                    | Sym. Ring-S stretching    |
| 1010                                                        | 1007                                                    | C-H i.p. deformation      |
| 812                                                         | 805                                                     | C-H o.p. deformation      |
| 743                                                         | 738                                                     | Ring deformation          |
| 480                                                         | 480                                                     | O.p. skeletal deformation |

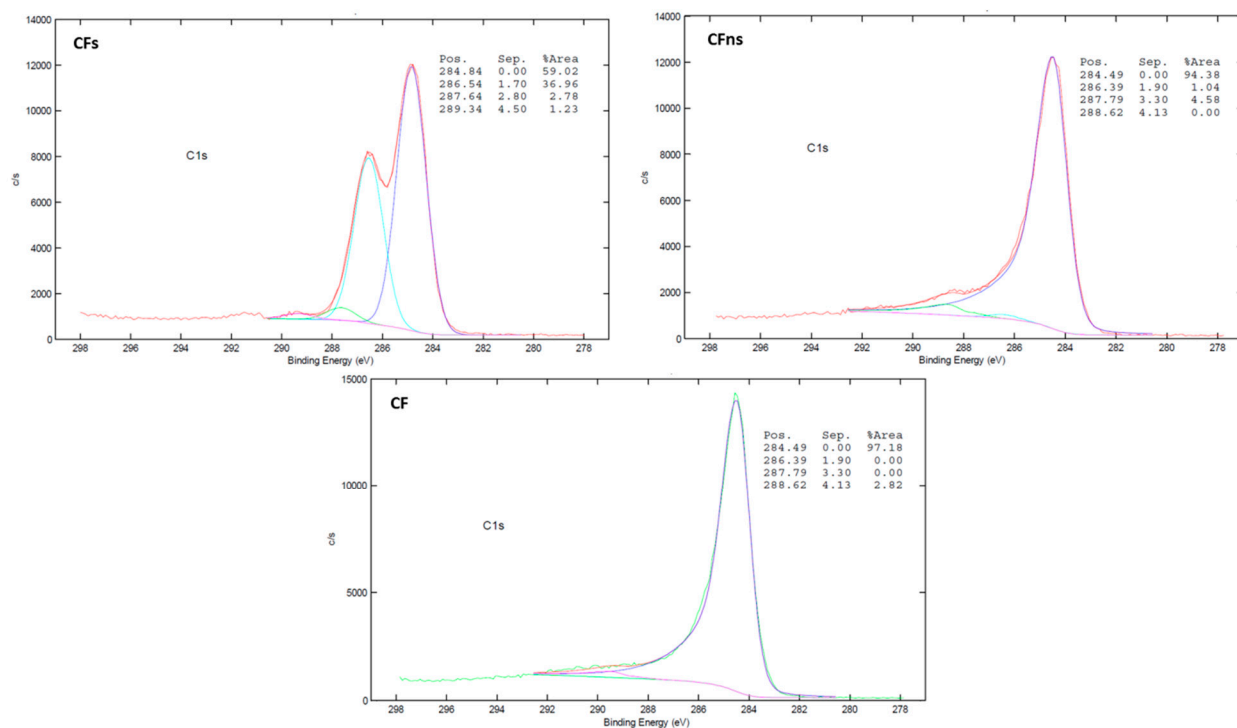

**Figure S2.** Decomposition of the Carbon pic.

**Table S2.** Chemical function obtained from the decomposition of C1s pic.

| Fiber | C-C/C-H | C-O/C-N | C=O/O-C-O | O-C=O |
|-------|---------|---------|-----------|-------|
| S-CF  | 59      | 37      | 3         | 1     |
| NS-CF | 94      | 1       | 5         | -     |
| NT-CF | 96      | 1       | -         | 3     |

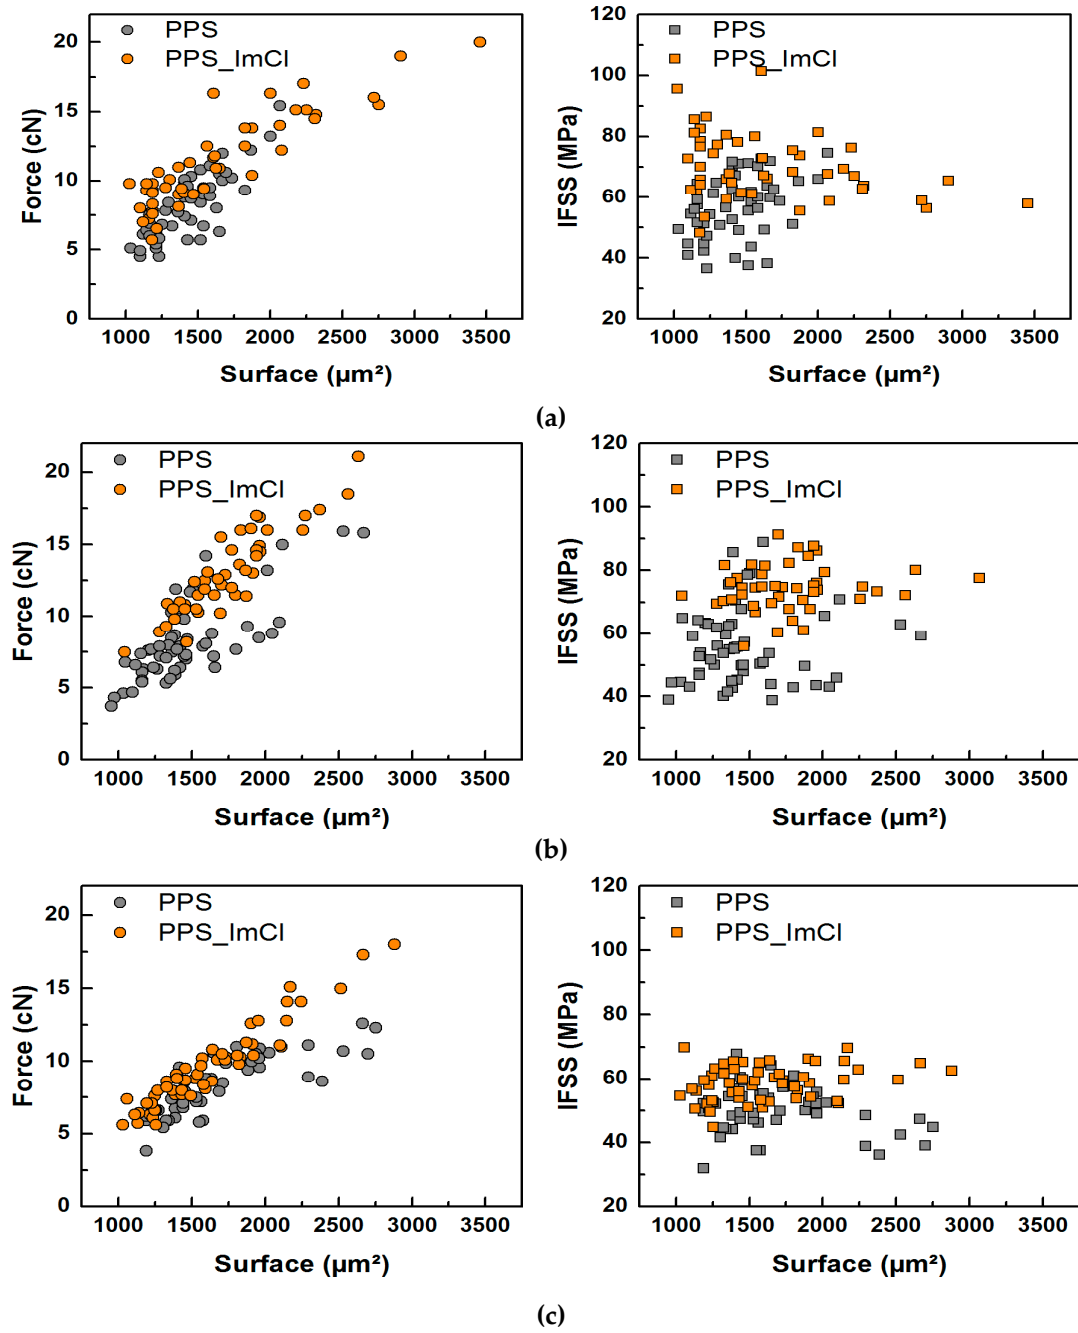

**Figure S3.** Evolution of interfacial Force and IFSS as a function the embedded surface for S-CF (a), NS-CF (b) and NT-CF (c) systems.
